# Supplementary material
Source: bioRxiv or medRxiv preprint supplement (https://www.biorxiv.org/highwire/filestream/65431/field_highwire_adjunct_files/0/213777-1.pdf)
Supplement: Supplementary file [file 213777-1.pdf]

Supplemental Table 1. F-values for fixed effects from the analysis of variance (ANOVA) of soil samples collected from the experimental field in which the TM1×NM24016 recombinant inbred line (RIL) population was evaluated at the Maricopa Agricultural Center in Maricopa, AZ. Soil sampling was performed in 2010 and 2012, with samples being collected at 5 depths: 0 – 30; 30 – 60; 60 – 90; 90 – 120; and 120 – 150 cm.

| Element | Year               | Depth      |
|---------|--------------------|------------|
| As      | 0.52 <sup>NS</sup> | 42.80****  |
| Ca      | 7.64*              | 134.70**** |
| Co      | 14.64*             | 63.16****  |
| Cu      | 9.78*              | 207.10**** |
| Fe      | 11.43*             | 43.17****  |
| K       | 84.95***           | 120.80**** |
| Mg      | 7.75*              | 3.80**     |
| Mn      | 11.91*             | 176.50**** |
| Mo      | 0.41 <sup>NS</sup> | 6.49****   |
| Ni      | 18.70*             | 70.06****  |
| P       | 0.22 <sup>NS</sup> | 39.62****  |
| Rb      | 30.10**            | 109.90**** |
| S       | 82.15****          | 26.86****  |
| Zn      | 31.01**            | 92.20****  |

NS Not Significant at the < 0.05 level.

\* Significant at the < 0.05 level.

\*\* Significant at the < 0.01 level.

\*\*\* Significant at the < 0.001 level.

\*\*\*\* Significant at the < 0.0001 level.

Supplemental Table 2. Geostatistical model parameters used for interpolation of soil element concentrations (kriging) across the experimental field at the Maricopa Agricultural Center in Maricopa, AZ, using the estimated best linear unbiased predictors (BLUPs) from a fitted linear mixed model. “Variance model” is the covariance structure used to account for spatial relationships of sampled data points. “Nugget” is the measurement error plus the variation that occurs over distances less than the shortest sampling interval. “Range” is the distance (m) at which spatial dependencies are no longer present, i.e. sampling points are spatially independent, and sill is the maximum variance at which this point occurs. SS Error, sums of squares error for the fitted model.

| Element | Log transformation | Variance model    | Nugget   | Range (m) | Sill     | SS Error |
|---------|--------------------|-------------------|----------|-----------|----------|----------|
| As      | No                 | Spherical         | 9.40E-02 | 16.79     | 4.42E-01 | 7.29E-03 |
| Ca      | Yes                | Spherical         | 1.47E-02 | 15.35     | 5.31E-02 | 1.97E-05 |
| Co      | No                 | Gaussian          | 2.91E-02 | 20.30     | 2.99E-02 | 7.94E-05 |
| Cu      | No                 | Spherical         | 1.91E-01 | 24.34     | 5.19E-01 | 9.90E-03 |
| Fe      | Yes                | Pentasphepherical | 5.67E-04 | 31.61     | 4.46E-04 | 1.23E-08 |
| K       | Yes                | Bessel            | 5.67E-04 | 12.49     | 1.19E-04 | 2.14E-09 |
| Mg      | Yes                | Pentasphepherical | 2.36E-03 | 24.98     | 1.23E-02 | 4.08E-06 |
| Mn      | No                 | Pentasphepherical | 2.26E+01 | 66.44     | 3.04E+01 | 3.01E+01 |
| Mo      | No                 | Pentasphepherical | 1.08E-03 | 12.59     | 3.91E-04 | 7.12E-08 |
| Ni      | No                 | Spherical         | 5.71E-02 | 26.51     | 1.14E-01 | 3.51E-04 |
| P       | Yes                | Spherical         | 3.97E-03 | 20.69     | 1.07E-02 | 2.12E-06 |
| Rb      | No                 | Pentasphepherical | 6.35E-01 | 39.09     | 7.09E-01 | 5.47E-02 |
| S       | Yes                | Nugget            | 2.60E-04 | 0.00      | 1.88E-12 | 7.44E-09 |
| Zn      | No                 | Pentasphepherical | 1.51E+00 | 35.72     | 1.33E+00 | 2.54E-01 |

Supplemental Table 3. Summary statistics for interpolated soil element concentrations. Means, standard deviations, minimum, maximum, and range of soil element concentrations (in parts per million) interpolated across the experimental field at the Maricopa Agricultural Center in Maricopa, AZ. Soil samples were collected from five depths at neutron probe installation sites that were distributed throughout the field in 2010 and 2012. For sulfur, no spatial pattern was observed. Therefore, only the nugget variance was used for modeling purposes, resulting in one interpolated value for the entire experimental field area. Nugget variance represents the measurement error plus the variation that occurs over distances less than the shortest sampling interval.

| Element | Mean     | Std. Dev. | Min.    | Max.     | Range   |
|---------|----------|-----------|---------|----------|---------|
| As      | 3.72     | 0.41      | 2.73    | 4.99     | 2.26    |
| Ca      | 8784.91  | 1092.17   | 5929.91 | 12809.64 | 6879.73 |
| Co      | 4.50     | 0.11      | 4.18    | 4.75     | 0.57    |
| Cu      | 15.42    | 0.49      | 13.95   | 16.51    | 2.57    |
| Fe      | 9184.29  | 122.20    | 8775.33 | 9424.81  | 649.48  |
| K       | 10140.95 | 104.14    | 9862.72 | 10353.72 | 491.00  |
| Mg      | 4774.15  | 311.36    | 3778.03 | 5455.11  | 1677.09 |
| Mn      | 256.44   | 3.88      | 244.98  | 264.99   | 20.02   |
| Mo      | 0.70     | 0.01      | 0.68    | 0.73     | 0.04    |
| Ni      | 7.95     | 0.23      | 7.15    | 8.53     | 1.37    |
| P       | 441.16   | 27.01     | 365.17  | 508.53   | 143.36  |
| Rb      | 21.76    | 0.58      | 19.70   | 23.32    | 3.62    |
| S       | 1089.90  | NA        | NA      | NA       | NA      |
| Zn      | 41.13    | 0.73      | 38.69   | 42.99    | 4.30    |

Supplemental Table 4. Fixed effects for elements. F-values for fixed effects from an analysis of variance (ANOVA) for the TM-1×NM24016 recombinant inbred line (RIL) population, its two parents, and commercial check varieties for elements analyzed in seed. Covariate indicates whether flowering time (i.e., time to first flower) or soil element concentration had a significant linear relationship with seed element concentration. Data were collected from 2010-12 at the Maricopa Agricultural Center located in Maricopa, AZ.

| Ion | Covariate type | Covariate | Genotype  | Irrigation regime  | Genotype*Irrigation regime |
|-----|----------------|-----------|-----------|--------------------|----------------------------|
| As  | Flowering      | 4.69*     | 4.81****  | 2.30 <sup>NS</sup> | 1.00 <sup>NS</sup>         |
| Ca  |                |           | 5.00****  | 6.97*              | 0.85 <sup>NS</sup>         |
| Co  | Soil element   | 13.70**** | 8.98****  | 0.11 <sup>NS</sup> | 1.66****                   |
| Cu  | Flowering      | 4.26*     | 18.86**** | 27.54****          | 1.26 <sup>NS</sup>         |
| Fe  |                |           | 8.83****  | 12.68**            | 0.93 <sup>NS</sup>         |
| K   |                |           | 5.11****  | 1.26 <sup>NS</sup> | 1.04 <sup>NS</sup>         |
| Mg  | Soil element   | 6.83**    | 9.82****  | 30.73****          | 1.20 <sup>NS</sup>         |
| Mn  |                |           | 11.75**** | 1.80 <sup>NS</sup> | 1.53**                     |
| Mo  |                |           | 3.24****  | 40.67****          | 1.30*                      |
| Ni  | Flowering      | 8.80**    | 10.76**** | 2.14 <sup>NS</sup> | 1.04 <sup>NS</sup>         |
| P   |                |           | 6.29****  | 3.17 <sup>NS</sup> | 0.67 <sup>NS</sup>         |
| Rb  | Soil element   | 46.89**** | 5.17****  | 4.07 <sup>NS</sup> | 1.01 <sup>NS</sup>         |
| S   |                |           | 8.34****  | 12.02**            | 8.34****                   |
| Zn  |                |           | 9.06****  | 19.99**            | 1.23 <sup>NS</sup>         |

NS Not Significant at the < 0.05 level.

\* Significant at the < 0.05 level.

\*\* Significant at the < 0.01 level.

\*\*\* Significant at the < 0.001 level.

\*\*\*\* Significant at the < 0.0001 level.

Supplemental Table 5. Phenotypic ( $\hat{r}_{pij}$ ) correlations with standard errors in parenthesis between the 14 elements evaluated in the TM-1×NM24016 recombinant inbred line (RIL) mapping population evaluated under contrasting irrigation regimes, water-limited (values above the diagonal) and well-watered (below the diagonal). Field trials were conducted from 2010-12 at the Maricopa Agricultural Center located in Maricopa, AZ.

|    | Mg           | Cu           | Ca           | Ni           | Co          | As           | Rb           | Fe           | K            | Mn           | Mo          | P            | S            | Zn           |
|----|--------------|--------------|--------------|--------------|-------------|--------------|--------------|--------------|--------------|--------------|-------------|--------------|--------------|--------------|
| Mg |              | 0.35 (0.09)  | 0.45 (0.08)  | 0.36 (0.09)  | 0.11 (0.10) | -0.35 (0.11) | 0.22 (0.10)  | 0.54 (0.07)  | 0.01 (0.10)  | 0.55 (0.07)  | 0.14 (0.10) | 0.66 (0.06)  | 0.22 (0.09)  | 0.66 (0.06)  |
| Cu | 0.39 (0.08)  |              | 0.30 (0.09)  | 0.19 (0.10)  | 0.15 (0.10) | 0.06 (0.10)  | 0.19 (0.10)  | 0.47 (0.08)  | 0.04 (0.10)  | 0.34 (0.09)  | 0.24 (0.09) | 0.35 (0.09)  | 0.24 (0.09)  | 0.46 (0.08)  |
| Ca | 0.43 (0.08)  | 0.20 (0.10)  |              | 0.32 (0.09)  | 0.13 (0.10) | -0.26 (0.11) | -0.03 (0.10) | 0.35 (0.09)  | -0.13 (0.10) | 0.60 (0.06)  | 0.11 (0.10) | 0.48 (0.08)  | 0.09 (0.10)  | 0.43 (0.08)  |
| Ni | 0.41 (0.08)  | 0.25 (0.09)  | 0.33 (0.09)  |              | 0.31 (0.09) | -0.33 (0.13) | 0.29 (0.09)  | 0.50 (0.07)  | 0.00 (0.10)  | 0.39 (0.08)  | 0.18 (0.09) | 0.50 (0.07)  | -0.03 (0.10) | 0.56 (0.07)  |
| Co | 0.14 (0.10)  | 0.25 (0.09)  | 0.13 (0.10)  | 0.35 (0.09)  |             | 0.13 (0.10)  | 0.06 (0.10)  | 0.30 (0.09)  | 0.28 (0.09)  | 0.30 (0.09)  | 0.22 (0.09) | 0.22 (0.09)  | 0.06 (0.10)  | 0.36 (0.09)  |
| As | -0.29 (0.11) | -0.03 (0.10) | -0.32 (0.11) | -0.26 (0.12) | 0.07 (0.10) |              | -0.04 (0.11) | -0.24 (0.12) | 0.17 (0.09)  | -0.07 (0.11) | 0.01 (0.10) | -0.26 (0.12) | 0.08 (0.10)  | -0.31 (0.13) |
| Rb | 0.20 (0.10)  | 0.16 (0.10)  | 0.17 (0.10)  | 0.24 (0.09)  | 0.08 (0.10) | -0.09 (0.11) |              | 0.19 (0.09)  | 0.33 (0.09)  | 0.25 (0.09)  | 0.07 (0.10) | 0.05 (0.10)  | 0.03 (0.10)  | 0.28 (0.09)  |
| Fe | 0.53 (0.07)  | 0.54 (0.07)  | 0.32 (0.09)  | 0.60 (0.06)  | 0.39 (0.08) | -0.15 (0.11) | 0.14 (0.10)  |              | 0.22 (0.09)  | 0.59 (0.06)  | 0.17 (0.09) | 0.47 (0.08)  | 0.16 (0.10)  | 0.77 (0.04)  |
| K  | -0.10 (0.10) | 0.05 (0.10)  | -0.11 (0.10) | -0.03 (0.10) | 0.10 (0.10) | 0.02 (0.10)  | 0.30 (0.09)  | 0.07 (0.10)  |              | 0.30 (0.09)  | 0.01 (0.10) | -0.04 (0.10) | 0.12 (0.10)  | 0.01 (0.10)  |
| Mn | 0.59 (0.06)  | 0.37 (0.09)  | 0.51 (0.07)  | 0.44 (0.08)  | 0.30 (0.09) | -0.19 (0.12) | 0.28 (0.09)  | 0.57 (0.07)  | 0.15 (0.10)  |              | 0.18 (0.09) | 0.36 (0.09)  | 0.08 (0.10)  | 0.57 (0.07)  |
| Mo | 0.13 (0.10)  | 0.27 (0.09)  | 0.19 (0.09)  | 0.33 (0.09)  | 0.23 (0.09) | 0.00 (0.10)  | 0.01 (0.10)  | 0.29 (0.09)  | 0.02 (0.10)  | 0.21 (0.09)  |             | 0.21 (0.09)  | 0.40 (0.08)  | 0.23 (0.09)  |
| P  | 0.63 (0.06)  | 0.43 (0.08)  | 0.43 (0.08)  | 0.57 (0.07)  | 0.23 (0.09) | -0.20 (0.12) | 0.11 (0.10)  | 0.52 (0.07)  | -0.05 (0.10) | 0.44 (0.08)  | 0.34 (0.08) |              | 0.16 (0.10)  | 0.65 (0.06)  |
| S  | 0.24 (0.09)  | 0.18 (0.10)  | 0.15 (0.10)  | 0.19 (0.10)  | 0.13 (0.10) | 0.04 (0.10)  | 0.11 (0.10)  | 0.20 (0.09)  | 0.22 (0.09)  | 0.16 (0.10)  | 0.52 (0.07) | 0.29 (0.09)  |              | 0.14 (0.10)  |
| Zn | 0.64 (0.06)  | 0.51 (0.07)  | 0.41 (0.08)  | 0.61 (0.06)  | 0.35 (0.09) | -0.30 (0.13) | 0.23 (0.09)  | 0.72 (0.05)  | -0.06 (0.10) | 0.55 (0.07)  | 0.28 (0.09) | 0.64 (0.06)  | 0.27 (0.09)  |              |

Supplemental Table 6. Genotypic ( $\hat{r}_{gij}$ ) correlations with standard errors in parenthesis between the 14 elements evaluated in the TM-1×NM24016 recombinant inbred line (RIL) mapping population evaluated under contrasting irrigation regimes, water-limited (values above the diagonal) and well-watered (below the diagonal). Field trials were conducted from 2010-12 at the Maricopa Agricultural Center located in Maricopa, AZ.

|    | Mg           | Cu           | Ca           | Ni           | Co          | As           | Rb           | Fe           | K            | Mn           | Mo          | P            | S            | Zn           |
|----|--------------|--------------|--------------|--------------|-------------|--------------|--------------|--------------|--------------|--------------|-------------|--------------|--------------|--------------|
| Mg |              | 0.36 (0.09)  | 0.46 (0.08)  | 0.37 (0.09)  | 0.11 (0.10) | -0.35 (0.11) | 0.22 (0.10)  | 0.55 (0.07)  | 0.01 (0.10)  | 0.57 (0.07)  | 0.14 (0.10) | 0.67 (0.06)  | 0.22 (0.10)  | 0.67 (0.06)  |
| Cu | 0.40 (0.09)  |              | 0.30 (0.09)  | 0.19 (0.10)  | 0.15 (0.10) | 0.06 (0.10)  | 0.19 (0.10)  | 0.48 (0.08)  | 0.04 (0.10)  | 0.35 (0.09)  | 0.25 (0.10) | 0.37 (0.09)  | 0.25 (0.10)  | 0.46 (0.08)  |
| Ca | 0.44 (0.08)  | 0.20 (0.10)  |              | 0.33 (0.09)  | 0.13 (0.10) | -0.26 (0.11) | -0.03 (0.10) | 0.36 (0.09)  | -0.13 (0.10) | 0.61 (0.07)  | 0.11 (0.10) | 0.50 (0.08)  | 0.09 (0.10)  | 0.44 (0.08)  |
| Ni | 0.41 (0.09)  | 0.25 (0.10)  | 0.34 (0.09)  |              | 0.31 (0.09) | -0.34 (0.13) | 0.29 (0.09)  | 0.52 (0.08)  | 0.00 (0.10)  | 0.40 (0.09)  | 0.19 (0.10) | 0.51 (0.08)  | -0.04 (0.10) | 0.56 (0.07)  |
| Co | 0.14 (0.10)  | 0.26 (0.10)  | 0.13 (0.10)  | 0.36 (0.09)  |             | 0.13 (0.10)  | 0.06 (0.10)  | 0.31 (0.09)  | 0.28 (0.10)  | 0.31 (0.09)  | 0.21 (0.10) | 0.24 (0.10)  | 0.07 (0.10)  | 0.37 (0.09)  |
| As | -0.30 (0.11) | -0.03 (0.10) | -0.32 (0.11) | -0.27 (0.13) | 0.07 (0.10) |              | -0.04 (0.11) | -0.24 (0.13) | 0.17 (0.10)  | -0.07 (0.11) | 0.01 (0.11) | -0.26 (0.13) | 0.09 (0.10)  | -0.32 (0.13) |
| Rb | 0.21 (0.10)  | 0.16 (0.10)  | 0.17 (0.10)  | 0.25 (0.09)  | 0.09 (0.10) | -0.09 (0.11) |              | 0.20 (0.09)  | 0.33 (0.09)  | 0.26 (0.09)  | 0.07 (0.10) | 0.05 (0.10)  | 0.03 (0.10)  | 0.28 (0.09)  |
| Fe | 0.55 (0.07)  | 0.55 (0.07)  | 0.33 (0.09)  | 0.62 (0.07)  | 0.41 (0.09) | -0.16 (0.12) | 0.15 (0.10)  |              | 0.23 (0.10)  | 0.61 (0.07)  | 0.17 (0.10) | 0.48 (0.08)  | 0.16 (0.10)  | 0.78 (0.04)  |
| K  | -0.10 (0.10) | 0.05 (0.10)  | -0.11 (0.10) | -0.03 (0.10) | 0.09 (0.10) | 0.02 (0.11)  | 0.31 (0.09)  | 0.06 (0.1)   |              | 0.30 (0.09)  | 0.00 (0.10) | -0.05 (0.10) | 0.12 (0.10)  | 0.01 (0.10)  |
| Mn | 0.61 (0.07)  | 0.37 (0.09)  | 0.51 (0.08)  | 0.45 (0.08)  | 0.30 (0.09) | -0.19 (0.12) | 0.28 (0.09)  | 0.59 (0.07)  | 0.15 (0.10)  |              | 0.18 (0.10) | 0.37 (0.09)  | 0.08 (0.10)  | 0.57 (0.07)  |
| Mo | 0.14 (0.10)  | 0.28 (0.10)  | 0.19 (0.10)  | 0.36 (0.09)  | 0.24 (0.10) | 0.00 (0.11)  | 0.01 (0.11)  | 0.30 (0.1)   | 0.01 (0.10)  | 0.21 (0.10)  |             | 0.23 (0.10)  | 0.41 (0.09)  | 0.24 (0.10)  |
| P  | 0.64 (0.06)  | 0.44 (0.08)  | 0.44 (0.08)  | 0.59 (0.07)  | 0.24 (0.10) | -0.21 (0.12) | 0.11 (0.10)  | 0.52 (0.08)  | -0.07 (0.10) | 0.45 (0.08)  | 0.37 (0.09) |              | 0.17 (0.10)  | 0.66 (0.06)  |
| S  | 0.24 (0.10)  | 0.18 (0.10)  | 0.15 (0.10)  | 0.20 (0.10)  | 0.13 (0.10) | 0.04 (0.01)  | 0.11 (0.10)  | 0.20 (0.10)  | 0.22 (0.10)  | 0.17 (0.10)  | 0.54 (0.08) | 0.29 (0.10)  |              | 0.14 (0.10)  |
| Zn | 0.65 (0.06)  | 0.51 (0.08)  | 0.41 (0.09)  | 0.61 (0.06)  | 0.36 (0.09) | -0.31 (0.13) | 0.24 (0.09)  | 0.73 (0.05)  | -0.06 (0.10) | 0.55 (0.07)  | 0.29 (0.10) | 0.66 (0.06)  | 0.28 (0.10)  |              |

Supplemental Table 7. Summary of quantitative trait loci (QTL) mapped using Bayesian classification mapping for 14 elements in the TM-1×NM24016 recombinant inbred line (RIL) population evaluated under contrasting irrigation regimes, water-limited (WL) and well-watered (WW) conditions, at the Maricopa Agricultural Center, Maricopa, AZ. Quantitative trait loci (QTL) significance is based on the reported Bayes factor with values larger than 100 indicating “decisive evidence” for a QTL, see Jeffreys (1961) for further details. Marker positions are reported as centimorgans (cM).

| Element | QTL name              | Irrigation regime <sup>a</sup> | Chr. <sup>b</sup> | LG <sup>c</sup> | Peak marker position (cM) | Peak marker | Bayes factor <sup>d</sup> | Beta <sup>e</sup> | SD <sup>f</sup> |
|---------|-----------------------|--------------------------------|-------------------|-----------------|---------------------------|-------------|---------------------------|-------------------|-----------------|
| As      | <i>qAs.A12.45.18</i>  | WW                             | A12               | 45              | 18.12                     | SNP0327     | 884.70                    | 0.45              | 0.13            |
|         | <i>qAs.A05.75.09</i>  | WW                             | A05               | 75              | 9.29                      | SNP0099     | 263.91                    | 0.41              | 0.21            |
|         | <i>qAs.D06.110.12</i> | WW                             | D06               | 110             | 12.38                     | DPL0080a    | 1.95E+07                  | 0.68              | 0.21            |
|         | <i>qAs.D06.112.04</i> | WW                             | D06               | 112             | 3.67                      | BNL1047a    | 1.76E+06                  | 0.63              | 0.26            |
| Ca      | <i>qCa.A06.19.07</i>  | WL                             | A06               | 19              | 7.31                      | SNP0479     | 800.14                    | -0.54             | 0.20            |
|         | <i>qCa.A12.45.18</i>  | WW                             | A12               | 45              | 18.12                     | SNP0327     | 214.06                    | -0.48             | 0.18            |
|         | <i>qCa.A06.117.22</i> | WW                             | A06               | 117             | 21.66                     | SNP0031     | 145.83                    | -0.46             | 0.23            |
| Cu      | <i>qCu.A07.28.00</i>  | WL                             | A07               | 28              | 0.00                      | DC30012a    | 4.50E+15                  | -1.38             | 0.31            |
|         | <i>qCu.A07.28.00</i>  | WW                             | A07               | 28              | 0.00                      | DC30012a    | 1484.98                   | -0.54             | 0.28            |
|         | <i>qCu.D01.64.20</i>  | WW                             | D01               | 64              | 19.55                     | SNP0026     | 134.95                    | -0.46             | 0.18            |
| Fe      | <i>qFe.A05.74.16</i>  | WL                             | A05               | 74              | 16.41                     | SNP0316     | 2.87E+06                  | -0.71             | 0.21            |
|         | <i>qFe.D12.116.00</i> | WL                             | D12               | 116             | 0.00                      | C2-055a     | 240.34                    | -0.44             | 0.16            |
| K       | <i>qK.A09.33.00</i>   | WW                             | A09               | 33              | 0.00                      | SHIN-0817a  | 1.41E+04                  | 0.63              | 0.15            |
|         | <i>qK.A10.87.03</i>   | WW                             | A10               | 87              | 3.31                      | SNP0312     | 1128.73                   | 0.52              | 0.23            |
|         | <i>qK.A11.91.25</i>   | WW                             | A11               | 91              | 24.87                     | SNP0382     | 1.26E+09                  | 0.88              | 0.15            |
| Mg      | <i>qMg.A11.44.27</i>  | WL                             | A11               | 44              | 27.39                     | NAU2152a    | 1511.42                   | -0.49             | 0.15            |
|         | <i>qMg.A12.45.21</i>  | WL                             | A12               | 45              | 21.39                     | SNP0047     | 1.37E+04                  | -0.53             | 0.14            |
|         | <i>qMg.A12.45.21</i>  | WW                             | A12               | 45              | 21.39                     | SNP0047     | 898.58                    | -0.52             | 0.16            |
|         | <i>qMg.D07.66.21</i>  | WL                             | D07               | 66              | 21.30                     | BNL1227a    | 117.73                    | -0.39             | 0.15            |
|         | <i>qMg.A05.74.16</i>  | WL                             | A05               | 74              | 16.41                     | SNP0316     | 194.18                    | -0.40             | 0.21            |
|         | <i>qMg.A06.117.22</i> | WW                             | A06               | 117             | 21.66                     | SNP0031     | 1329.09                   | -0.53             | 0.19            |
| Mo      | <i>qMo.A02.69.00</i>  | WL                             | A02               | 69              | 0.00                      | JESPR101a   | 283.57                    | -0.49             | 0.16            |
| Ni      | <i>qNi.D01.64.20</i>  | WL                             | D01               | 64              | 19.55                     | SNP0026     | 120.92                    | -0.38             | 0.17            |

|    |                       |    |     |     |       |            |          |       |      |
|----|-----------------------|----|-----|-----|-------|------------|----------|-------|------|
|    | <i>qNi.A05.74.05</i>  | WW | A05 | 74  | 4.77  | SNP0055    | 795.22   | -0.49 | 0.15 |
|    | <i>qNi.A05.74.13</i>  | WL | A05 | 74  | 12.52 | SNP0035    | 4176.56  | -0.46 | 0.21 |
|    | <i>qNi.D12.116.00</i> | WL | D12 | 116 | 0.00  | C2-055a    | 155.76   | -0.38 | 0.14 |
|    | <i>qNi.D12.116.00</i> | WW | D12 | 116 | 0.00  | C2-055a    | 582.49   | -0.47 | 0.24 |
| P  | <i>qP.A03.06.34</i>   | WL | A03 | 6   | 33.92 | SNP0130    | 7960.08  | -0.62 | 0.15 |
|    | <i>qP.A11.43.14</i>   | WL | A11 | 43  | 14.42 | DPL1121a   | 170.76   | -0.47 | 0.18 |
|    | <i>qP.A05.74.05</i>   | WL | A05 | 74  | 4.77  | SNP0055    | 102.23   | -0.45 | 0.17 |
|    | <i>qP.A05.74.05</i>   | WW | A05 | 74  | 4.77  | SNP0055    | 3.12E+05 | -0.70 | 0.24 |
| Rb | <i>qRb.A05.14.02</i>  | WW | A05 | 14  | 2.02  | SNP0155    | 1492.16  | -0.51 | 0.16 |
|    | <i>qRb.A08.30.14</i>  | WW | A08 | 30  | 13.63 | SNP0214    | 392.68   | -0.45 | 0.23 |
|    | <i>qRb.A12.45.00</i>  | WW | A12 | 45  | 0.00  | SNP0264    | 115.62   | -0.42 | 0.19 |
|    | <i>qRb.D10.83.18</i>  | WW | D10 | 83  | 17.96 | SHIN-1586a | 7471.98  | -0.56 | 0.15 |
|    | <i>qRb.D06.112.25</i> | WW | D06 | 112 | 25.00 | DC30135a   | 247.30   | -0.45 | 0.15 |
| Zn | <i>qZn.A05.74.13</i>  | WW | A05 | 74  | 12.52 | SNP0035    | 1050.32  | -0.52 | 0.22 |
|    | <i>qZn.A05.74.16</i>  | WL | A05 | 74  | 16.41 | SNP0316    | 133.68   | -0.43 | 0.27 |

- a. Irrigation regime, irrigation regime for which a QTL was identified.
- b. Chr., chromosome on which the marker is located based on Pauli et al. (2016).
- c. LG, linkage group.
- d. Bayes factor, converted posterior probability indicating likelihood of QTL presence.
- e. Beta, fitted regression coefficient for respective marker in model.
- f. SD, standard deviation of the regression coefficient, beta, from fitted model.



Supplemental Table 8. Summary of significant quantitative trait loci (QTL) identified using the multi-trait analysis approach of seemingly unrelated regression (SUR) to map two independent groupings of elements in the TM-1×NM24016 recombinant inbred line (RIL) population evaluated under contrasting irrigation regimes, water-limited (WL) and well-watered (WW) conditions, at the Maricopa Agricultural Center, Maricopa, AZ. Select elements were combined into biologically relevant groupings based on biochemical function as outlined in Taiz and Zeiger (2006) and Mengel and Kirkby (2012), The “ionic” group consists of calcium, potassium, magnesium, and manganese, whereas the “redox” group is composed of iron, zinc, copper, nickel, and molybdenum. The *P*-values associated with the respective marker is significant at a Bonferroni-corrected threshold of  $\alpha = 0.05$ . Marker positions are reported as centimorgans (cM).

| Category | QTL name                | Marker     | Chr. <sup>a</sup> | LG <sup>b</sup> | Position | Irrigation regime | SUR <i>P</i> -value |
|----------|-------------------------|------------|-------------------|-----------------|----------|-------------------|---------------------|
| Redox    | <i>qRedox.A03.05.14</i> | SNP0023    | A03               | 5               | 13.94    | WW                | 9.96E-08            |
| Redox    | <i>qRedox.A03.06.27</i> | SNP0286    | A03               | 6               | 26.83    | WL                | 2.44E-08            |
|          |                         |            |                   |                 |          | WW                | 6.58E-08            |
| Ionic    | <i>qIonic.A03.09.10</i> | SHIN-0473a | A03               | 9               | 10.34    | WL                | 5.60E-06            |
| Redox    | <i>qRedox.A06.17.14</i> | SNP0191    | A06               | 17              | 14.08    | WW                | 1.34E-05            |
| Ionic    | <i>qIonic.A06.19.07</i> | SNP0479    | A06               | 19              | 7.31     | WL                | 5.08E-05            |
| Redox    | <i>qRedox.A06.19.11</i> | SNP0404    | A06               | 19              | 10.62    | WL                | 3.78E-05            |
| Ionic    | <i>qIonic.A07.24.17</i> | CIR238a    | A07               | 24              | 16.60    | WW                | 4.94E-05            |
| Redox    | <i>qRedox.A07.28.00</i> | DC30012a   | A07               | 28              | 0.00     | WL                | 1.36E-09            |
|          |                         |            |                   |                 |          | WW                | 3.88E-05            |
| Ionic    | <i>qIonic.A09.33.17</i> | TMB2483a   | A09               | 33              | 17.12    | WL                | 1.18E-06            |
|          |                         |            |                   |                 |          | WW                | 9.14E-06            |
| Ionic    | <i>qIonic.A11.39.01</i> | DPL1931a   | A11               | 39              | 0.53     | WL                | 8.46E-06            |
|          |                         |            |                   |                 |          | WW                | 4.47E-05            |
| Ionic    | <i>qIonic.A11.41.02</i> | DPL1379a   | A11               | 41              | 1.57     | WL                | 1.10E-06            |
|          |                         |            |                   |                 |          | WW                | 1.49E-06            |
| Ionic    | <i>qIonic.A11.42.06</i> | SNP0258    | A11               | 42              | 5.86     | WL                | 1.54E-05            |
| Redox    | <i>qRedox.A11.44.00</i> | SNP0058    | A11               | 44              | 0.00     | WW                | 4.28E-05            |
| Ionic    | <i>qIonic.A12.47.06</i> | SNP0265    | A12               | 47              | 6.11     | WL                | 5.59E-05            |
| Ionic    | <i>qIonic.A12.50.01</i> | BNL0666    | A12               | 50              | 0.69     | WL                | 2.31E-05            |
| Redox    | <i>qRedox.D12.52.07</i> | SNP0348    | D12               | 52              | 6.58     | WL                | 1.41E-05            |
|          |                         |            |                   |                 |          | WW                | 3.19E-06            |

|       |                          |            |     |     |       |    |          |
|-------|--------------------------|------------|-----|-----|-------|----|----------|
| Ionic | <i>qIonic.D02.59.00</i>  | BNL4061a   | D02 | 59  | 0.00  | WL | 2.02E-05 |
|       |                          |            |     |     |       | WW | 1.96E-05 |
| Ionic | <i>qIonic.A01.61.09</i>  | TMB1931a   | A01 | 61  | 9.32  | WL | 5.67E-05 |
| Redox | <i>qRedox.D01.64.20</i>  | SNP0026    | D01 | 64  | 19.55 | WL | 9.02E-07 |
|       |                          |            |     |     |       | WW | 1.10E-06 |
| Redox | <i>qRedox.A02.69.00</i>  | JESPR101a  | A02 | 69  | 0.00  | WL | 4.58E-06 |
| Redox | <i>qRedox.A05.74.05</i>  | SNP0055    | A05 | 74  | 4.77  | WL | 6.84E-09 |
|       |                          |            |     |     |       | WW | 5.66E-08 |
| Redox | <i>qRedox.A05.74.16</i>  | SNP0316    | A05 | 74  | 16.41 | WL | 6.24E-09 |
|       |                          |            |     |     |       | WW | 5.62E-07 |
| Ionic | <i>qIonic.D05.76.13</i>  | DPL0595a   | D05 | 76  | 12.82 | WL | 7.85E-07 |
|       |                          |            |     |     |       | WW | 6.91E-07 |
| Ionic | <i>qIonic.D05.80.17</i>  | SNP0196    | D05 | 80  | 16.96 | WW | 1.28E-05 |
| Redox | <i>qRedox.D10.88.10</i>  | SNP0064    | D10 | 88  | 9.85  | WL | 1.45E-09 |
|       |                          |            |     |     |       | WW | 3.48E-06 |
| Ionic | <i>qIonic.A11.91.23</i>  | SNP0227    | A11 | 91  | 22.70 | WW | 2.38E-05 |
| Ionic | <i>qIonic.D11.92.00</i>  | SHIN-1214b | D11 | 92  | 0.00  | WL | 1.01E-06 |
|       |                          |            |     |     |       | WW | 6.61E-06 |
| Ionic | <i>qIonic.D04.95.00</i>  | BNL4030a   | D04 | 95  | 0.00  | WL | 6.06E-06 |
| Ionic | <i>qIonic.D09.97.05</i>  | SNP0114    | D09 | 97  | 4.77  | WW | 3.03E-06 |
| Redox | <i>qRedox.D08.105.04</i> | SNP0005    | D08 | 105 | 3.52  | WL | 5.28E-05 |
|       |                          |            |     |     |       | WW | 2.78E-05 |
| Ionic | <i>qIonic.A06.117.22</i> | SNP0031    | A06 | 117 | 21.66 | WW | 1.24E-05 |

a. Chr., chromosome on which the marker is located based on Pauli et al. (2016).

b. LG, linkage group.

Supplemental Table 9. Comparison of marker loci that were below the critical threshold in the Bayesian classification method (Bayes factor of 10), but were detected using the multi-trait mapping method of seemingly unrelated regression (SUR) in two irrigation regimes, water-limited (WL) and well-watered (WW). Tables A and B display results associated with the multi-element grouping of ionic (Ca, K, Mg, and Mn) and redox (Fe, Zn, Cu, Ni, and Mo) in the multi-trait analysis. The *P*-value associated with the significant marker identified in the multi-trait analysis is significant at a Bonferroni-corrected  $\alpha = 0.05$ .

#### A. Ionic: Ca, K, Mg, and Mn

| Marker information |                   |                 |          | Irrigation Regime <sup>a</sup> | Bayes factors for single elements |      |    |    | SUR <i>P</i> -value |
|--------------------|-------------------|-----------------|----------|--------------------------------|-----------------------------------|------|----|----|---------------------|
| Marker             | Chr. <sup>b</sup> | LG <sup>c</sup> | Position |                                | Ca                                | K    | Mg | Mn |                     |
| TMB2483a           | A09               | 33              | 17.12    | WW                             | 4.48                              | -    | -  | -  | 9.14E-06            |
| DPL1379a           | A11               | 41              | 1.57     | WW                             | -                                 | -    | -  | -  | 1.49E-06            |
| SNP0265            | A12               | 47              | 6.11     | WL                             | 1.02                              | -    | -  | -  | 5.59E-05            |
| BNL0666            | A12               | 50              | 0.69     | WL                             | -                                 | 2.55 | -  | -  | 2.31E-05            |
| TMB1931a           | A01               | 61              | 9.32     | WL                             | 2.48                              | -    | -  | -  | 5.67E-05            |
| DPL0595a           | D05               | 76              | 12.82    | WL                             | -                                 | 0.21 | -  | -  | 7.85E-07            |

#### B. Redox: Fe, Zn, Cu, Ni, and Mo

| Marker information |                   |                 |          | Irrigation Regime <sup>a</sup> | Bayes factors for single elements |      |      |    |       | SUR <i>P</i> -value |
|--------------------|-------------------|-----------------|----------|--------------------------------|-----------------------------------|------|------|----|-------|---------------------|
| Marker             | Chr. <sup>b</sup> | LG <sup>c</sup> | Position |                                | Fe                                | Zn   | Cu   | Ni | Mo    |                     |
| SNP0023            | A03               | 5               | 13.94    | WW                             | 3.94                              | -    | -    | -  | -     | 9.96E-08            |
| SNP0058            | A11               | 44              | 0.00     | WW                             | -                                 | 1.23 | -    | -  | 29.61 | 4.28E-05            |
| SNP0348            | D12               | 52              | 6.58     | WW                             | -                                 | -    | 1.54 | -  | -     | 3.19E-06            |
| SNP0005            | D08               | 105             | 3.52     | WW                             | -                                 | 0.61 | -    | -  | -     | 2.78E-05            |

a. Irrigation regime, irrigation regime for which a QTL was identified.

b. Chr., chromosome on which the marker is located based on Pauli et al. (2016).

c. LG, linkage group.

d. SUR *P*-value, *P*-value from the multi-trait analysis using seemingly unrelated regression.
